# Supplementary material for: Significance of the ZnO nanorod array morphology for low-bandgap polymer solar cells in inverted structures
Source: Royal Society of Chemistry journal article supplement (doi:10.1039/c3ta13203j), 2013-01-01
Supplement: c3ta13203j.pdf [file c3ta13203j.pdf]

## Supporting information for Journal of Materials Chemistry A

### Significance of the ZnO Nanorod Array Morphology for Low-bandgap Polymer Solar Cells in Inverted Structures

Shao-Hsuan Kao<sup>†</sup>, Zong-Liang Tseng<sup>†</sup>, Ping-Yi Ho<sup>†</sup>, Chia-Yu Kao<sup>‡</sup>, Subramani Thiyagu<sup>†</sup>

and Ching-Fuh Lin<sup>†,‡,\*</sup>

<sup>†</sup> Graduate Institute of Photonics and Optoelectronics, National Taiwan University, No. 1, Sec. 4, Roosevelt Road, Taipei 10617, Taiwan, ROC.

<sup>‡</sup> Graduate Institute of Electronics Engineering, National Taiwan University, No. 1, Sec. 4, Roosevelt Road, Taipei 10617, Taiwan, ROC.

\* Corresponding author. Address: Institute of Photonics and Optoelectronics, National Taiwan University, Taipei, 10617 Taiwan, Republic of China.; Tel: +886-2-33663540; Fax: +886-2-23642603;

E-mail address: [cflin@cc.ee.ntu.edu.tw](mailto:cflin@cc.ee.ntu.edu.tw)

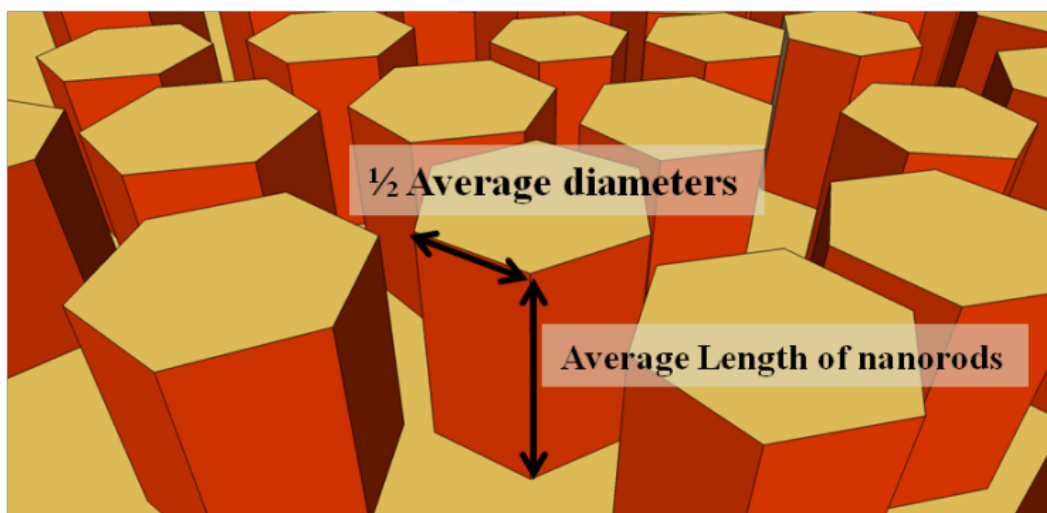

**Figure S1.** The schematic model of the ZnO Nanorod Array.

$$\left(\frac{A}{2}\right) \times B \times 6 \times C = \text{ZnO Nanorods increased in unit area}$$

- A. Average Diameter of ZnO nanorods
- B. Average Length of ZnO nanorods
- C. Density of ZnO nanorods (per  $\mu\text{m}^2$ )

**Table S1** ZnO nanorod array parameters measured by ImageJ software.

|               |                                 | Ave. D <sup>a</sup> | Ave. L <sup>b</sup> | # <sup>c</sup> (per $\mu\text{m}^2$ ) | Ave. S <sup>d</sup> |
|---------------|---------------------------------|---------------------|---------------------|---------------------------------------|---------------------|
| Zinc nitrate: | average                         | 24.6                | 77.5                | 912                                   | 34.3                |
| HMT=1.0:0.4   | Standard Deviation ( $\sigma$ ) | 0.49                | 1.4                 | 15                                    | 0.82                |
| Zinc nitrate: | average                         | 25.0                | 90.2                | 900                                   | 27.1                |
| HMT=1.0:0.5   | Standard Deviation ( $\sigma$ ) | 0.60                | 1.9                 | 19                                    | 0.57                |
| Zinc nitrate: | average                         | 25.8                | 103                 | 944                                   | 22.7                |
| HMT=1.0:0.6   | Standard Deviation ( $\sigma$ ) | 0.46                | 1.8                 | 17                                    | 0.53                |
| Zinc nitrate: | average                         | 29.9                | 114                 | 720                                   | 19.5                |
| HMT=1.0:0.7   | Standard Deviation ( $\sigma$ ) | 0.63                | 2.1                 | 16                                    | 0.47                |
| Zinc nitrate: | average                         | 34.1                | 125                 | 580                                   | 16.1                |
| HMT=1.0:0.8   | Standard Deviation ( $\sigma$ ) | 0.73                | 2.0                 | 13                                    | 0.52                |
| Zinc nitrate: | average                         | 50.2                | 138                 | 304                                   | 13.4                |
| HMT=1.0:1.0   | Standard Deviation ( $\sigma$ ) | 1.00                | 2.3                 | 7.7                                   | 0.33                |
| Zinc nitrate: | average                         | 60.9                | 178                 | 152                                   | 7.20                |
| HMT=1.0:1.2   | Standard Deviation ( $\sigma$ ) | 1.83                | 5.9                 | 5.5                                   | 0.22                |

- Average Diameters of ZnO nanorods (nm)
- Average Length of ZnO nanorods (nm)
- Number of ZnO nanorods (per  $\mu\text{m}^2$ )
- Average Spacing between ZnO nanorods (nm)
